# Supplementary material for: The Human Placental Amniotic Membrane Mesenchymal-Stromal-Cell-Derived Conditioned Medium Inhibits Growth and Promotes Apoptosis of Human Cholangiocarcinoma Cells In Vitro and In Vivo by Suppressing IL-6/JAK2/STAT3 Signaling
Source: MDPI journal article supplement (doi:10.3390/cells12242788), 2023-12-07
Supplement: s1 [file s1]

## Supplementary data

### Repeat 1

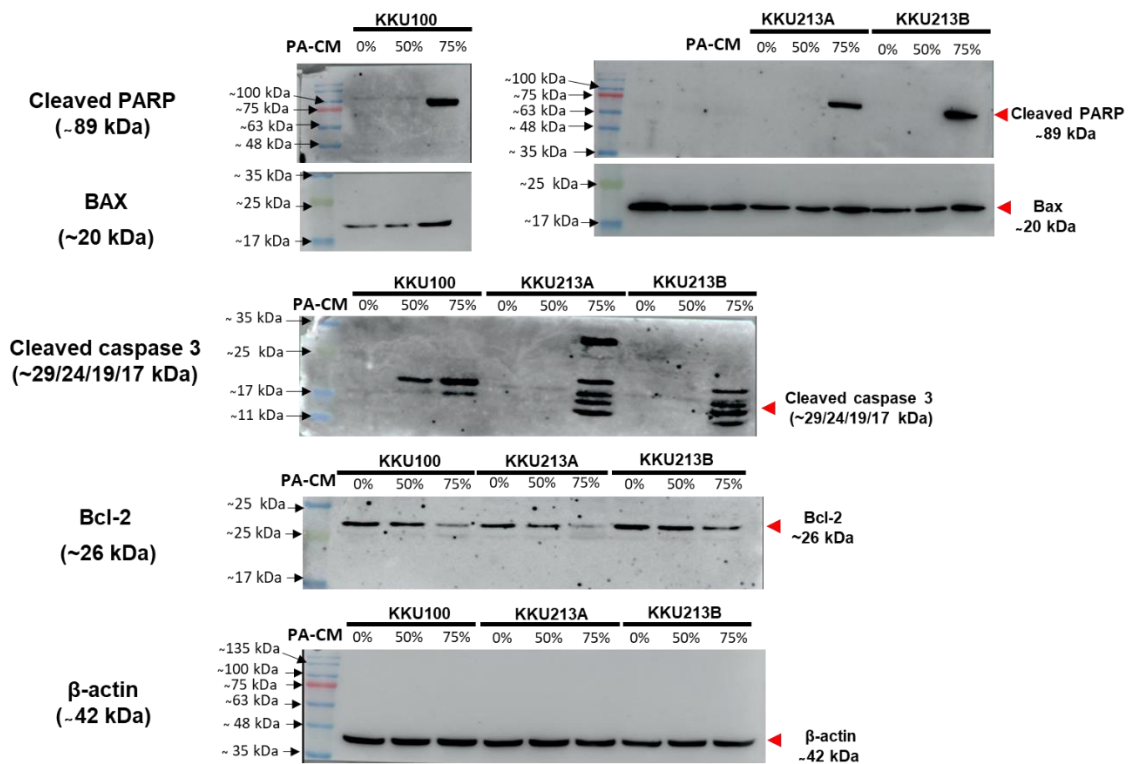

### Repeat 2

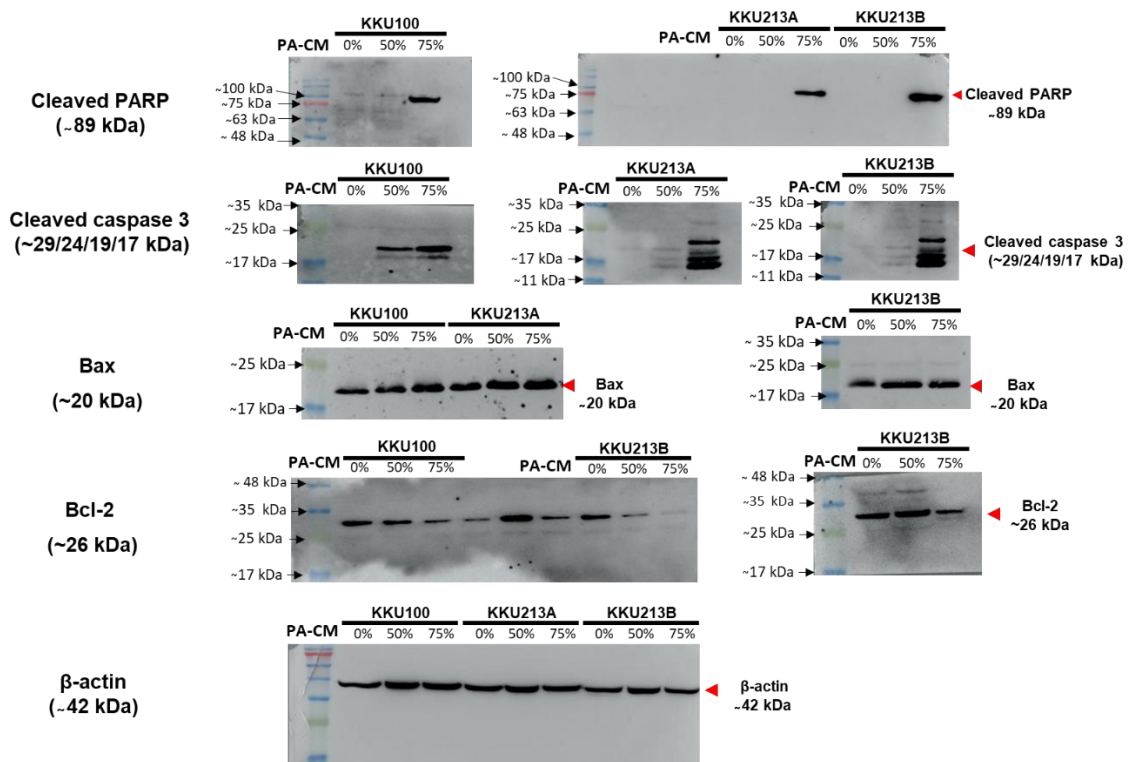

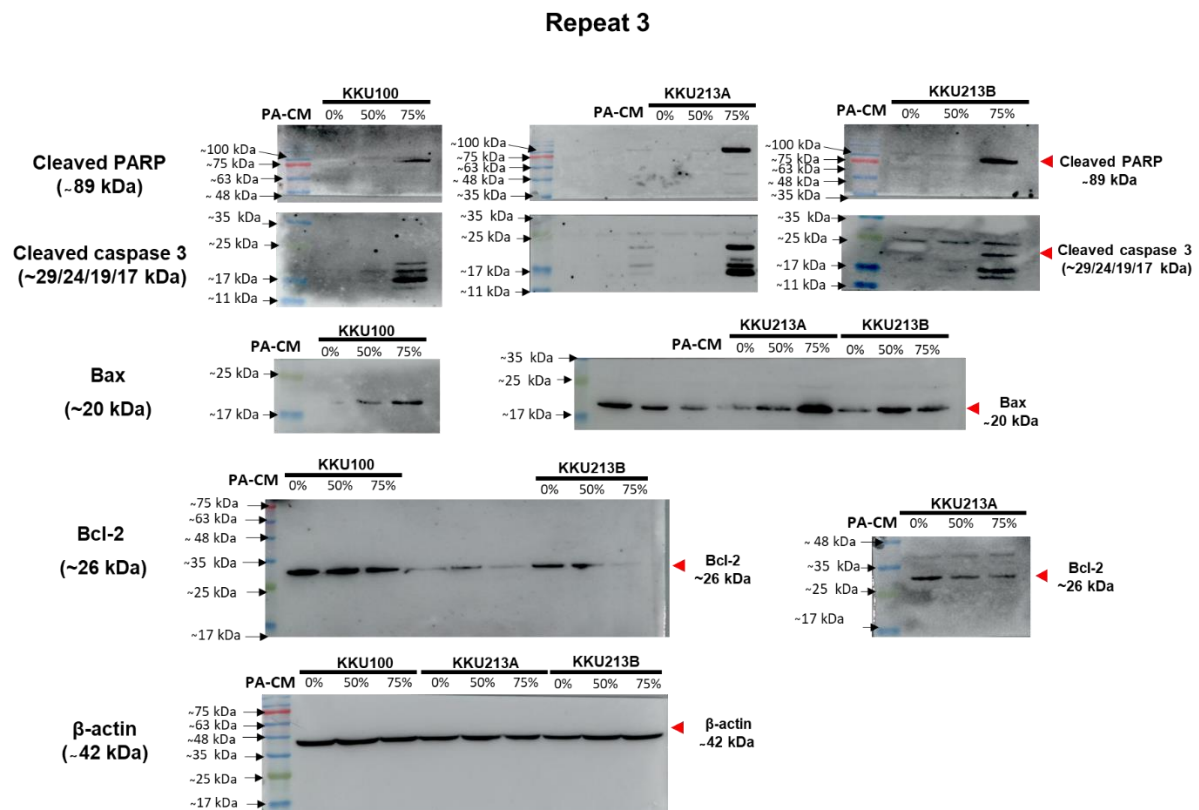

**Figure S1. Full-length blots for Figure 4B.** Three repeats of the immunoblotting for Cleaved PARP (89 kDa), β-actin (42 kDa), Cleaved caspase 3 (29/24/19/17 kDa), Bcl-2 (26 kDa) and Bax (20 kDa).

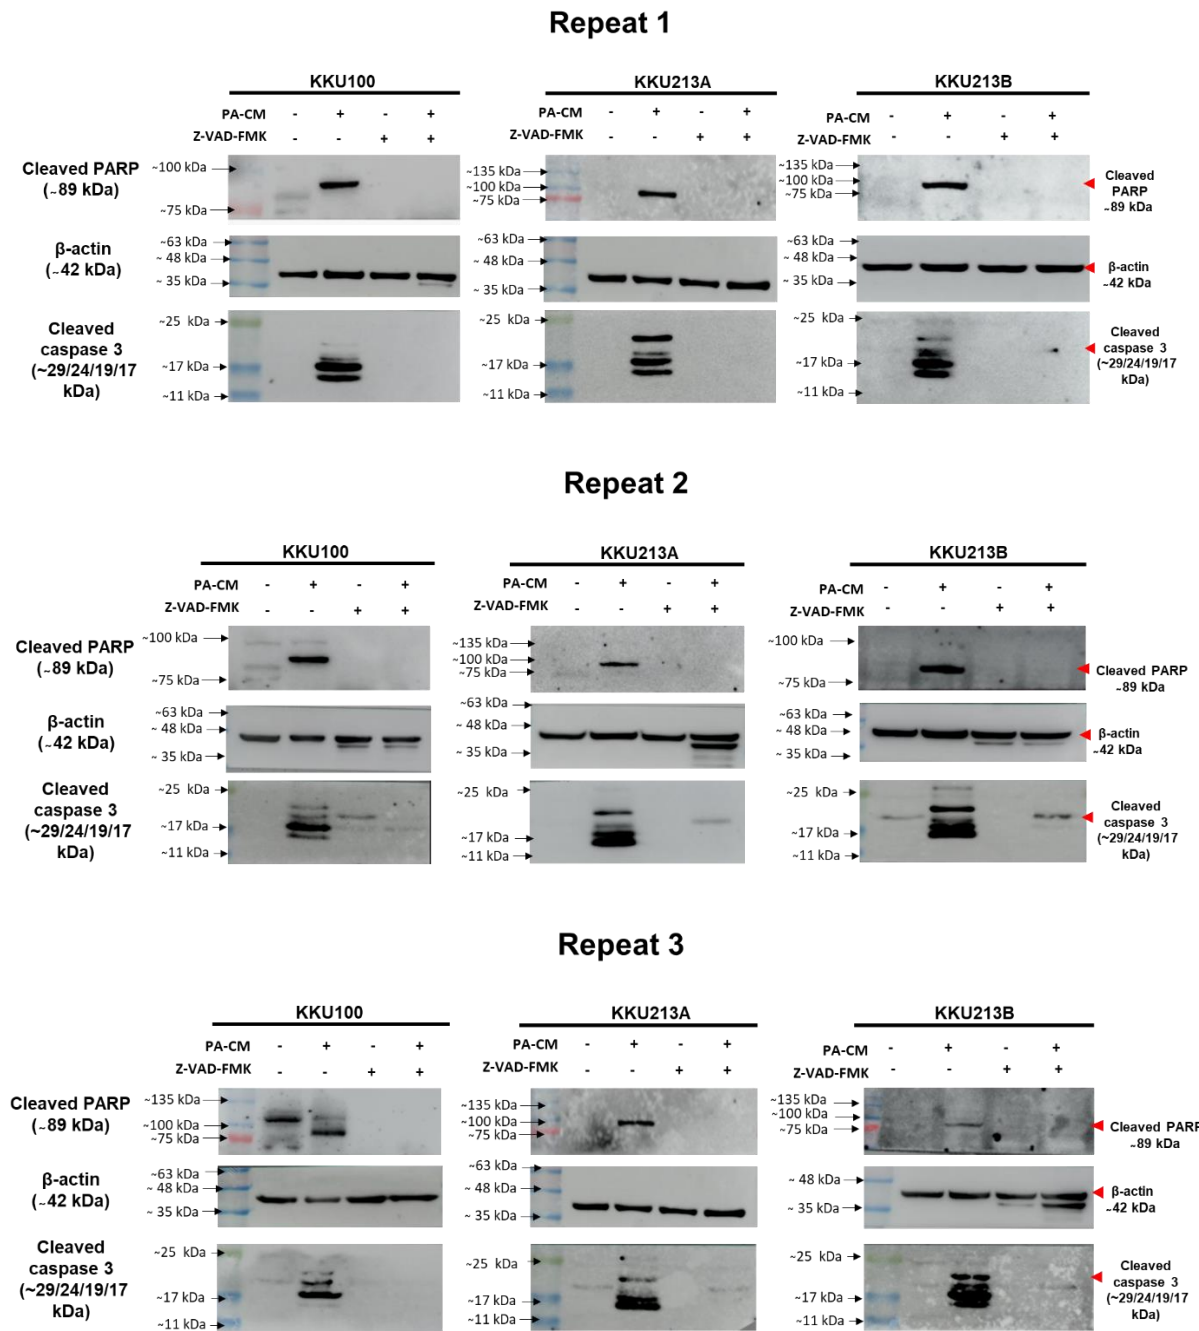

**Figure S2. Full-length blots for Figure 4D.** Three repeats of the immunoblotting for Cleaved PARP (89 kDa), β-actin (42 kDa) and Cleaved caspase 3 (29/24/19/17 kDa).

## Repeat 1

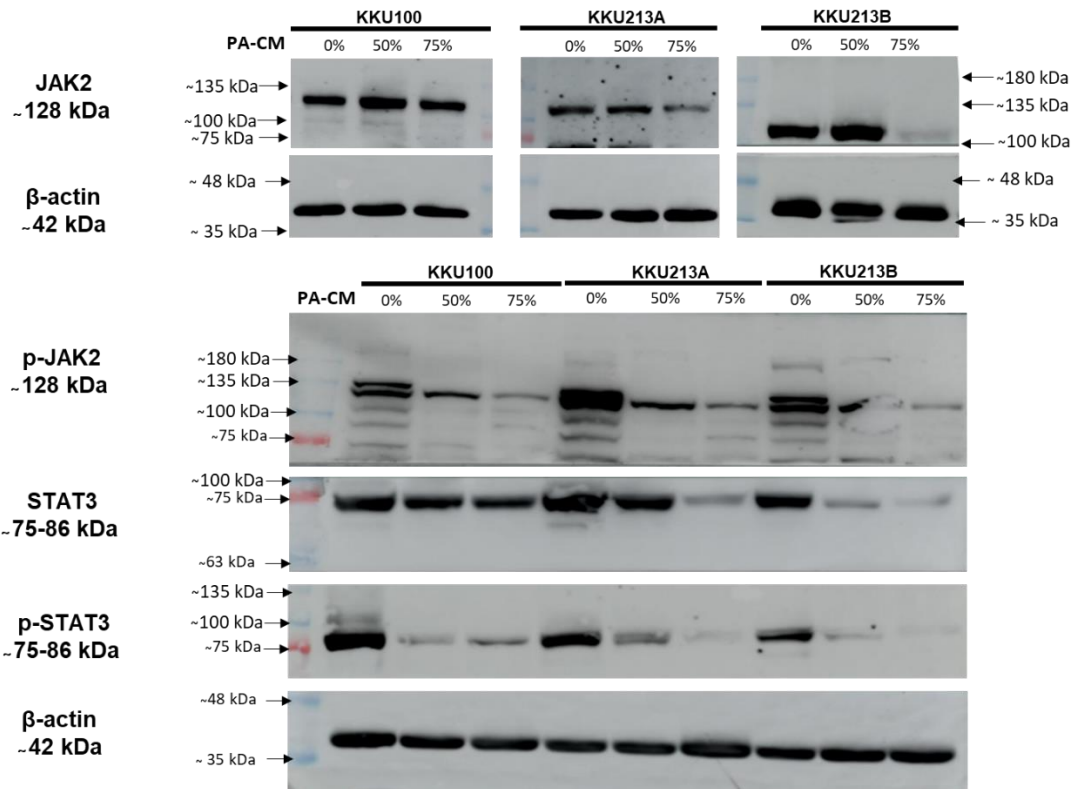

## Repeat 2

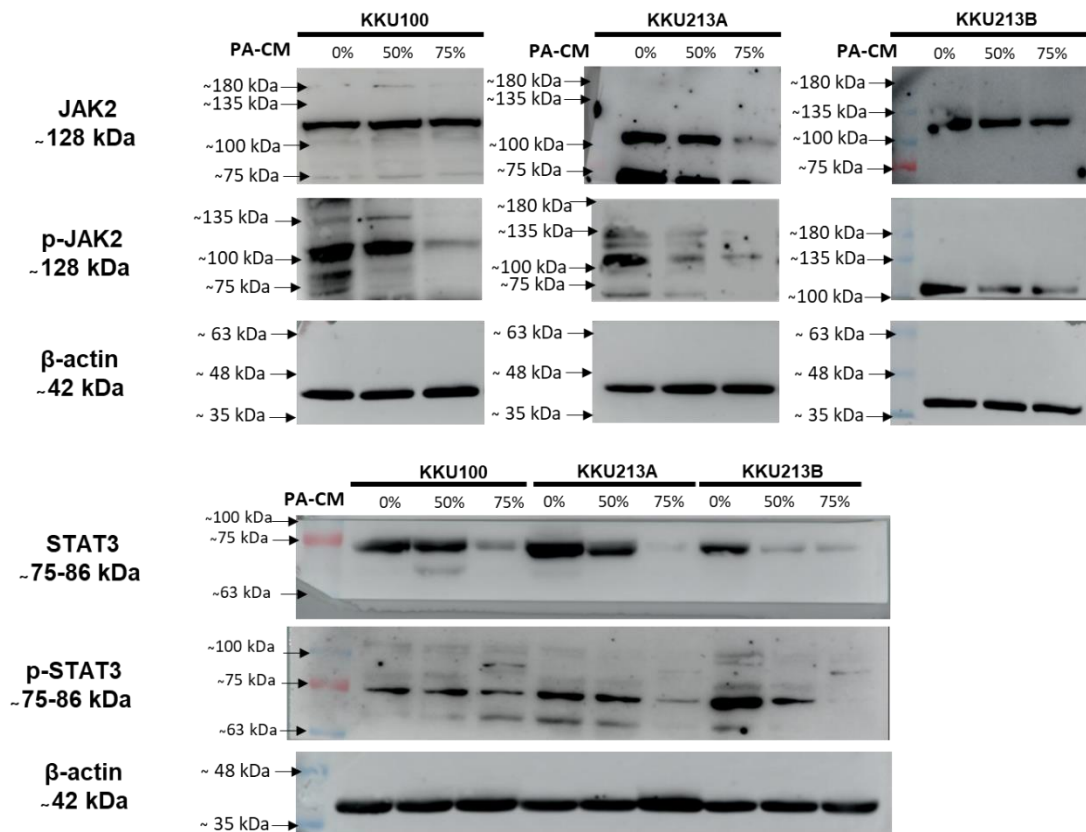

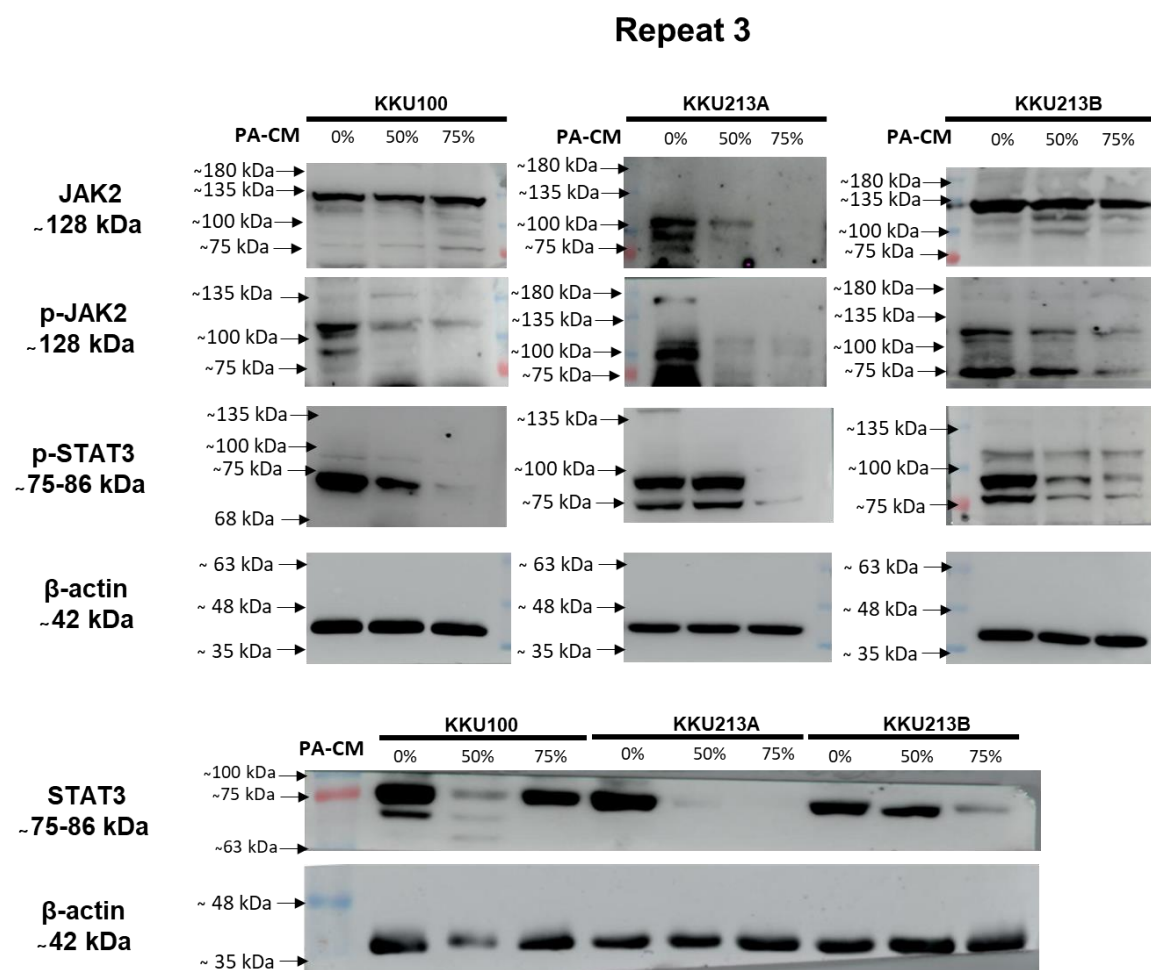

**Figure S3. Full-length blots for Figure 5A.** Three repeats of the immunoblotting for JAK2 (128 kDa), p-JAK2 (128 kDa), STAT3 (75-86 kDa), p-STAT3 (75-86 kDa) and β-actin (42 kDa).

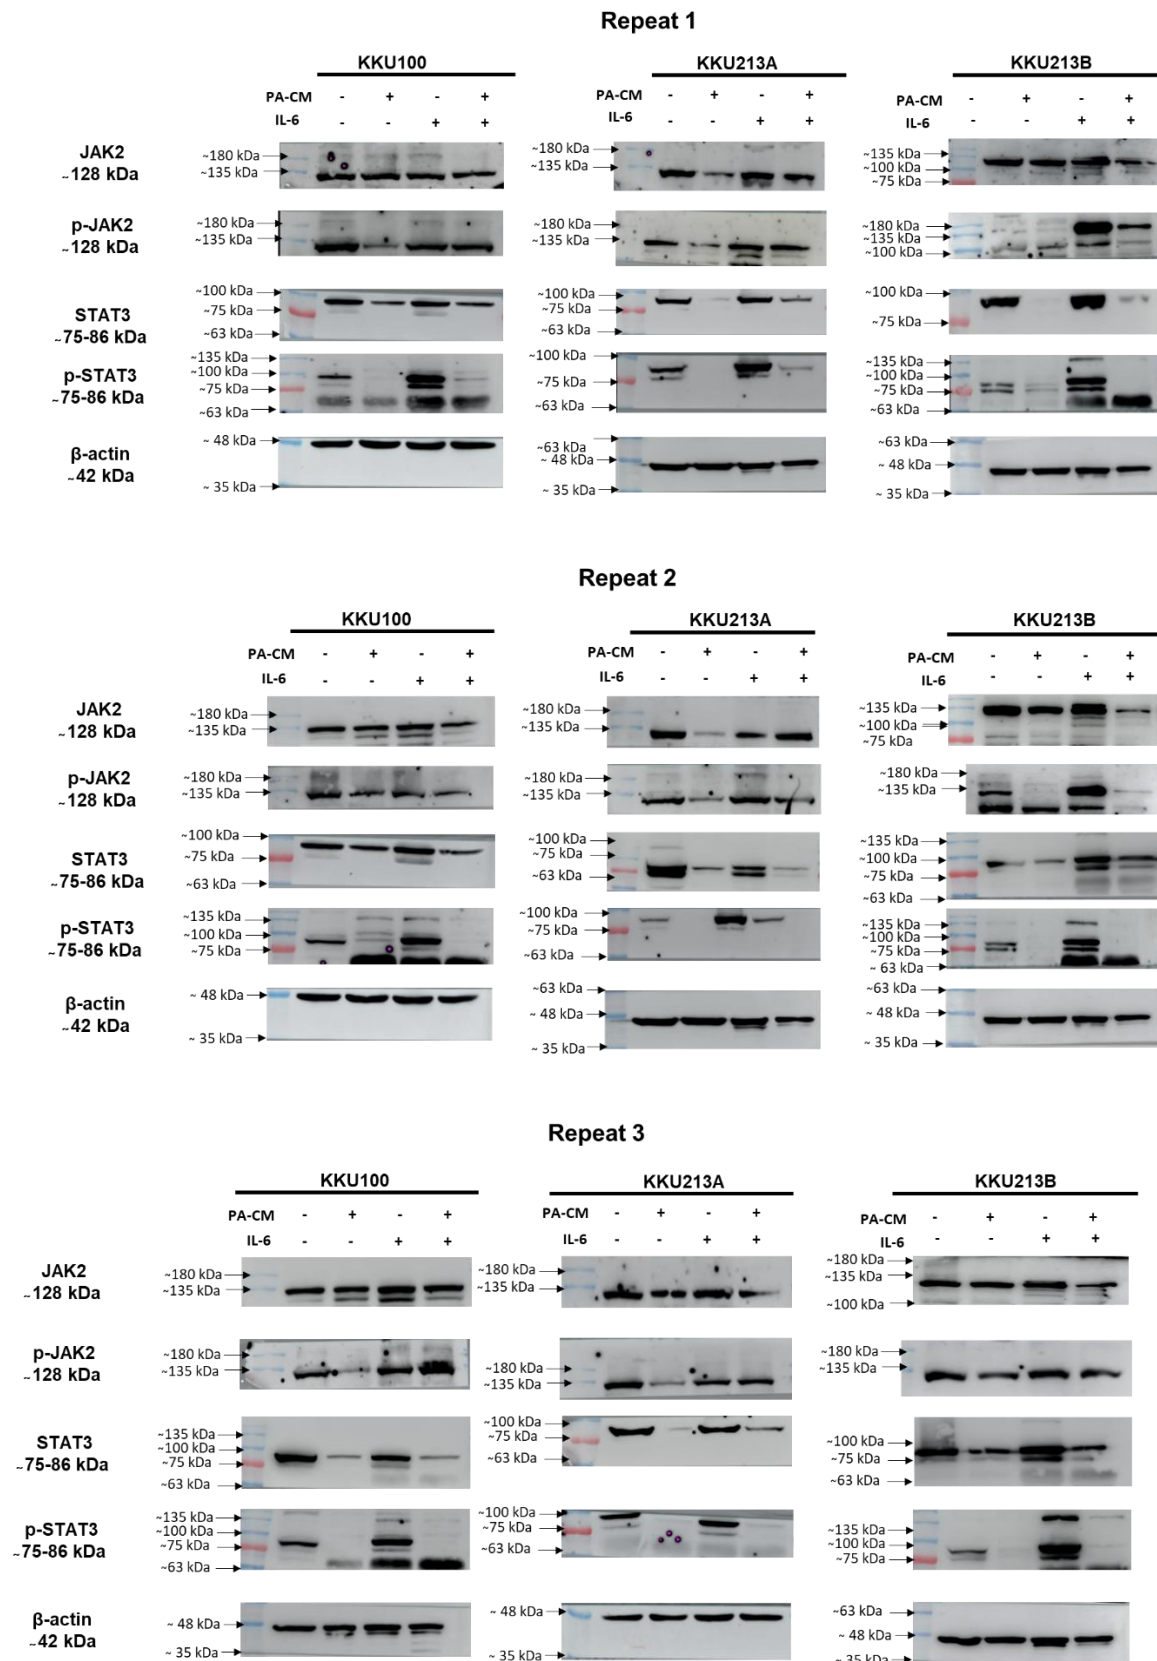

**Figure S4. Full-length blots for Figure 5D.** Three repeats of the immunoblotting for JAK2 (128 kDa), p-JAK2 (128 kDa), STAT3 (75-86 kDa), p-STAT3 (75-86 kDa) and β-actin (42 kDa).



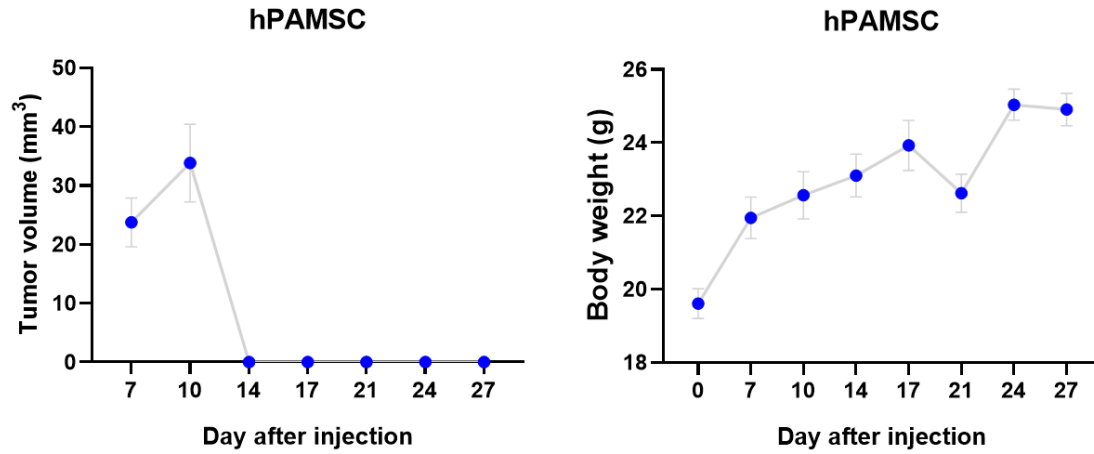

**Figure S5. The tumor volume and the average body weight of the transplanted hPAMSC mice.** Mice (n=4) were subcutaneously injected with  $2 \times 10^6$  hPAMSC in 200  $\mu$ L of FBS-free medium supplemented with 100  $\mu$ L Matrigel. The tumor size was measured with a caliper, and the mice's body weight was monitored every 4 days after the initial injection. Fourteen days after transplantation, the transplanted hPAMSC was undetectable and had no effect on tumor-induced weight loss in these mice.
